# Supplementary material
Source: PubMed Central journal article supplement (PMC8728698)
Supplement: NIHMS1766083-supplement-1.pdf [file NIHMS1766083-supplement-1.pdf]

## Supplementary information

### Supplementary methods

**Drug Preparation and Administration.** ORY-3001 was obtained from Oryzon Genomics S.A (Barcelona, Spain). The drug was stored at 4°C and freshly dissolved in deionized water prior to administration. Serial dilutions were made and the drug was administered orally to mice at 0.25, 0.5 and 1.0 mg/kg/d for four days. For baboon studies oral administration was performed via gavage on anesthetized animals. The range of doses tested in the baboons was between 10 and 200  $\mu\text{g}/\text{Kg}$  (dose volume per unit body = 2 mL/Kg; formulation strength = 5-100  $\mu\text{g}/\text{mL}$ ).

**RNA purification and analysis.** RNA was purified from mouse peripheral blood using a Mouse RiboPure Blood RNA Isolation kit (Life Technologies, Waltham, MA.) and samples were treated with the DNA-free DNase Treatment and removal kit. cDNA was synthesized using the RevertAid first strand cDNA synthesis kit (Thermo Scientific, Waltham, MA.) according to the manufacturer's instructions. Levels of human  $\beta$ - (Hs00361131\_g1), and  $\gamma$ -globin (Hs00747223\_g1) mRNA and mouse were measured by real time PCR using the indicated Taqman primer-probe combinations (Life Technologies, Waltham, MA.).<sup>1</sup>

RNA was isolated from directly from the peripheral blood (50  $\mu\text{L}$ ) of anemic baboons or from normal baboon reticulocytes enriched from the peripheral blood by Percoll (GE Healthcare, Upsalla, Sweden) gradient sedimentation<sup>2</sup> using RNeasy Mini Kits (Qiagen, Hilden, Germany) The transcript levels of both  $\beta$  and  $\gamma$  hemoglobin chains were quantified by real-time PCR using primers amplifying the baboon  $\gamma$ - and  $\beta$ -globin transcripts using Taqman primer-probe combinations.<sup>3</sup> The sequence of the primers and probes are listed below:

$\beta$  forward GCT GGT GGT CTA CCC TTG GA  
 $\beta$  reverse AGG AGA GGA CAG ATC CCC AAA  
 $\beta$  probe 6FAMCCA GAG GTT CTT TGA TTC MGBNFQ  
 $\gamma$  forward CGG CAA GAA GGT GCT CAC TT  
 $\gamma$  reverse GCC CTT GAG ATC ATC CAG GTT  
 $\gamma$  probe 6FAMCTT GGG AGA TGC CG MGBNFQ

**F cell and F retic analysis.** F-cells and F-retics in samples were analyzed by flow cytometry using the Cytomics FC500 (Beckman Coulter, Brea, Ca.) system after staining with thiazole orange and PE-conjugated anti- HbF (BD Bioscience, San Jose, Ca.).

**Analysis of Globin chain synthesis.** Biosynthetic radiolabeling of globin chain synthesis was performed by incubation of peripheral blood in the presence of [<sup>3</sup>H] leucine (Perkin Elmer, Shelton, CT.). Incubations were performed with 50 $\mu\text{L}$  peripheral blood from anemic baboons or reticulocyte-enriched Percoll fractions of peripheral blood from normal baboons. Incubations were performed in media consisting of leucine-free  $\alpha$ -MEM (Life Technologies), 20% v/v extensively dialyzed fetal bovine serum, glutamine, 1mg/mL holotransferrin (Sigma, St. Louis, MO), 1.25 mg/mL ferrous ammonium chloride hexahydrate and 50  $\mu\text{Ci}$  [<sup>3</sup>H] leucine at 37°C for 3-4 hours. Following incubations, cells were washed three times in phosphate-buffered saline and pellets stored at -80°C until samples were processed.

Following the addition of 0.5 mL H<sub>2</sub>O, the pellets were subjected to 3 freeze-thaw cycles in a dry ice-methanol bath to lyse the cells. Lysates were centrifuged 10,000 RPM, 15 minutes at 4°C. The supernatant was removed and then re-centrifuged prior to filtration using a Nalgene 0.2  $\mu\text{m}$  syringe filter (Thermo Fisher). Separation of globin chains was achieved by high-performance liquid chromatography using a Thermo Fisher Spectra high performance liquid chromatography system.<sup>4</sup> A volume of 100  $\mu\text{L}$  of filtered lysate was injected into a LiChrospher RP8 Column (EMD chemicals, Germany) separation of globin chains was performed using gradients of Buffer A (68:4:28 ratio of acetonitrile: methanol: 0.155 M NaCl) and Buffer B (26:33:41 ratio of acetonitrile: methanol: 0.077 M NaCl, pH 2.7) Fraction (0.5 mL) were collected directly into 7 ml scintillation vials using a fraction collector. 3 mL of Biosafe II scintillation fluid was added (RPI, Mt. Prospect, IL) and radioactive content quantitated using a TriCARB 3110TR scintillation counter (Perkin Elmer, Shelton, CT.).

**Supplementary Table 1.** Comparison of inhibitory activities (EC<sub>50</sub>) of TCP (tranylcypromine, parnate), RN-1, and ORY-3001 for LSD1, MAO-A, and MAO-B.

| Compound      | LSD1 EC <sub>50</sub> ( $\mu\text{M}$ ) | MAO-A EC <sub>50</sub> ( $\mu\text{M}$ ) | MAO-B EC <sub>50</sub> ( $\mu\text{M}$ ) |
|---------------|-----------------------------------------|------------------------------------------|------------------------------------------|
| TCP (parnate) | 15 - 35                                 | 2                                        | 0.6                                      |
| RN-1          | 0.03                                    | 11                                       | 9                                        |
| ORY-3001      | 0.018                                   | >100                                     | >100                                     |

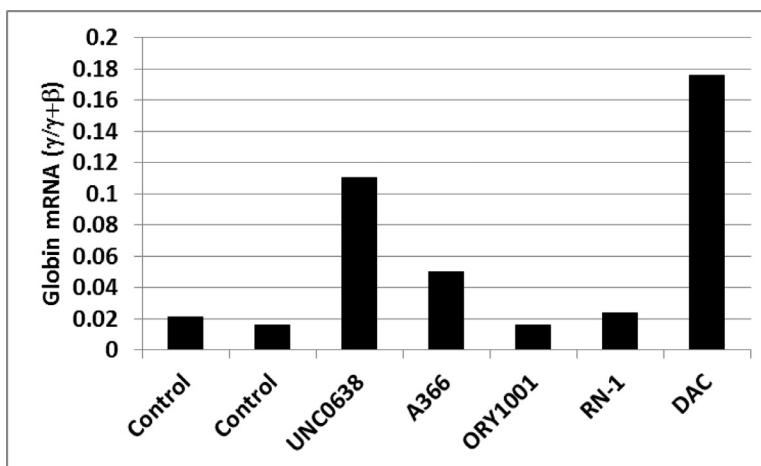

**Supplemental Figure 1.** Effect of drugs targeting the epigenetic-modifying enzymes G9A, LSD1 and DNMT1 on  $\gamma$ -globin expression in HUDEP-2 cell line. Exponentially growing HUDEP-2 cells were incubated for 72 hours in the presence of the G9A inhibitors UNC0638 and A366 ( $3 \times 10^{-6}$ M each), the LSD1 inhibitors ORY-1001 and RN-1 ( $3 \times 10^{-6}$  m each), the DNMT1 inhibitor decitabine ( $3 \times 10^{-7}$ M). Drug was not added to control cultures. Effect on  $\gamma$ -globin mRNA ( $\gamma/\gamma+\beta$ ) was measured by RT-PCR.

### Supplementary Data

#### Supplementary Table 1

#### Supplemental Figure 1

### Supplemental References.

- Rivers A, Vaitkus k, Ruiz MA, Ibanez V, Jagadeeswaran, Kouznetsova T, DeSimone j, Lavelle D. RN-1, a potent and selective lysine-specific demethylase 1 inhibitor, increases  $\gamma$ -globin expression, F reticulocytes, and F cells in a sickle cell disease mouse model. *Exp Hematol* 2015;43(7):546-553.
- Alderman EM, Fudenberg HH, Lovins RE. Binding of immunoglobulin classes to subpopulations of human red blood cells separated by density gradient centrifugation. *Blood* 55 1980;55: 817-822.
- Banzon V, Ibanez V, Vaitkus K, Ruiz MA, Peterson K, DeSimone J, Lavelle d. siDNMT1 increases  $\gamma$ -globin expression in chemical inducer of dimerization (CID)-dependent mouse  $\beta$ YAC bone marrow cells and in baboon erythroid progenitor cell cultures. *Exp hematol* 2011;39(1):26-36.
- Leone L, Monteleone M, Gabutti V, Amione C. Reversed-phase high-performance liquid chromatography of human haemoglobin chains. *J Chromatogr* 1985;321(2):407-419.
